# Supplementary material for: Idiopathic Hypertrophic Spinal Pachymeningitis
Source: PubMed Central journal article supplement — J Med Cases. 2023 Dec 29;14(12):405–12. doi: 10.14740/jmc4149 (PMC10769654; doi:10.14740/jmc4149), 2023-12-29
Supplement: jmc-14-405-s001.pdf [file jmc-14-405-s001.pdf]

**Suppl 1.** Literature search on PubMed for published cases of IHSP since 2009

| <b>Study</b>                | <b>Age (years)</b> | <b>Sex</b> | <b>Acute/progressive</b> | <b>Ataxia</b> | <b>Weakness</b> | <b>Sensory symptoms</b> | <b>Bowel/bladder</b> | <b>Neck/back pain</b> | <b>UMN signs</b> |
|-----------------------------|--------------------|------------|--------------------------|---------------|-----------------|-------------------------|----------------------|-----------------------|------------------|
| Alsulaiman A 2020 [4]       | 38                 | F          | P                        | -             | +               | -                       | -                    | +                     | Yes              |
| Bang JH et al 2015 [5]      | 67                 | F          | P                        | +             | -               | -                       | -                    | +                     | Yes              |
| Fakuda A et al 2017 [6]     | 51                 | M          | P                        | -             | +               | -                       | -                    | +                     | NA               |
| TK Jee et al 2014 [7]       | 58                 | F          | P                        | -             | +               | -                       | -                    | -                     | No               |
| Kim JH et al 2011 [8]       | 55                 | F          | P                        | -             | +               | +                       | +                    | +                     | NA               |
|                             | 45                 | F          | A                        | -             | +               | -                       | -                    | -                     | NA               |
| Lowden MR et al 2009 [9]    | 42                 | F          | P                        | -             | -               | +                       | -                    | -                     | Yes              |
| Lucas Lodomiro AM 2020 [10] | 19                 | F          | A                        | +             | +               | -                       | -                    | -                     | NA               |
| Olubajo F et al 2017 [11]   | 51                 | F          | A                        | -             | +               | +                       | +                    | -                     | No               |
| Chen et al 2012 [12]        | 49                 | M          | P                        | -             | -               | -                       | -                    | +                     | No               |
| Hsu et al 2015 [13]         | 41                 | M          | P                        | -             | +               | +                       | -                    | -                     | NA               |
| Van der pal et al 2015 [14] | 58                 | F          | P                        | -             | +               | +                       | +                    | +                     | Yes              |
| Park JY et al 2020 [15]     | 79                 | F          | P                        | +             | +               | -                       | -                    | +                     | No               |
| Qin et al 2015 [16]         | 44                 | F          | A                        | -             | +               | +                       | +                    | +                     | Yes              |
| Kutty RK et al 2019 [17]    | 29                 | F          | P                        | -             | +               | -                       | -                    | +                     | Yes              |
| Ranasinghe et al 2011 [18]  | 42                 | F          | P                        | +             | -               | +                       | -                    | -                     | Yes              |
|                             | 77                 | F          | P                        | +             | +               | +                       | -                    | -                     | Yes              |
|                             | 65                 | M          | P                        | +             | -               | +                       | -                    | -                     | No               |
| Takahashi H et al 2010 [19] | 67                 | M          | P                        | -             | +               | +                       | +                    | -                     | Yes              |
| Park TJ et al 2016 [20]     | 51                 | F          | P                        | -             | +               | +                       | -                    | +                     | Yes              |

|                              |    |   |   |   |   |   |   |   |     |
|------------------------------|----|---|---|---|---|---|---|---|-----|
| Tosa M et al 2015 [21]       | 63 | M | P | + | + | + | + | + | No  |
| Maheshwari V et al 2016 [22] | 42 | M | P | - | + | + | - | + | Yes |
| Present case                 | 40 | M | P | - | + | + | - | - | NO  |

Abbreviations: M: male, F: female, A (acute): disease onset to disability within 24 hours, P (progressive): disease onset to disability more than 24 hours, (+): present, (-): absent or not mentioned, NA: not available.

| Study                       | Protein | Cells                           | ESR | CRP | RA |
|-----------------------------|---------|---------------------------------|-----|-----|----|
| Alsulaiman A 2020 [4]       | -       | 60, lymphocyte predominant      | -   | -   | -  |
| Bang JH et al 2015 [5]      | -       | -                               | -   | -   | -  |
| Fakuda A et al 2017 [6]     | -       | -                               | -   | -   | -  |
| TK Jee et al 2014 [7]       | -       | -                               | +   | -   | -  |
| Kim JH et al 2011 [8]       | -       | -                               | +   | +   | -  |
| Lowden MR et al 2009 [9]    | -       | -                               | +   | +   | -  |
| Lucas Lodomiro AM 2020 [10] | -       | -                               | +   | -   | -  |
| Olubajo F et al 2017 [11]   | -       | -                               | -   | +   | -  |
| Chen et al 2012 [12]        | -       | -                               | -   | -   | -  |
| Hsu et al 2015 [13]         | -       | -                               | -   | -   | -  |
| Van der pal et al 2015 [14] | -       | -                               | -   | -   | -  |
| Park JY et al 2020 [15]     | -       | -                               | +   | +   | +  |
| Qin et al 2015 [16]         | 6,160   | Lymphocyte predominant WBCs 150 | -   | -   | -  |
| Kutty RK et al 2019 [17]    | 150     | Lymphocyte predominant          | -   | -   | -  |
| Ranasinghe et al 2011 [18]  | -       | -                               | -   | -   | -  |
|                             | -       | -                               | -   | -   | -  |
|                             | -       | -                               | -   | -   | -  |
| Takahashi H et al 2010 [19] | -       | -                               | +   | +   | +  |

|                              |       |                             |   |   |   |
|------------------------------|-------|-----------------------------|---|---|---|
| Park TJ et al 2016 [20]      | -     | -                           | + | + | - |
| Tosa M et al 2015 [21]       | 243   | 20, lymphocyte predominant  | + | + | - |
| Maheshwari V et al 2016 [22] | -     | -                           | - | - | - |
| Present case                 | 1,620 | 188, lymphocyte predominant | - | - | - |

Abbreviations: ESR: erythrocytic sedimentation rate, WBC: white blood cells, CRP: C-reactive protein, RA: rheumatoid arthritis factor.

| <b>Study</b>                | <b>T1</b> | <b>T2</b> | <b>Contrast enhancement</b> | <b>Location</b> | <b>Spinal segments</b> |
|-----------------------------|-----------|-----------|-----------------------------|-----------------|------------------------|
| Alsulaiman A 2020 [4]       | NA        | Hypo      | +                           | Ant and post    | C2-C7                  |
| Bang JH et al 2015 [5]      | Hypo      | Hypo      | +                           | Posterior       | occiput to C2          |
| Fukuda A et al 2017 [6]     | Hypo      | Hypo      | +                           | Posterior       | C2-T1                  |
| TK Jee et al 2014 [7]       | Hypo      | Hypo      | -                           | Posterior       | C5-C7                  |
| Kim JH et al 2011 [8]       | Hypo      | Hypo      | NA                          | NA              | C6-T7                  |
|                             | Hypo      | Hypo      | NA                          | Posterior       | C1-C4                  |
| Lowden MR et al 2009 [9]    | NA        | Hypo      | NA                          | Anterior        | T2-T5                  |
| Lucas Lodomiro AM 2020 [10] | NA        | NA        | NA                          | Posterior       | C7-T4                  |
| Olubajo F et al 2017 [11]   | Hypo      | Hypo      | NA                          | Ant and post    | T3-T8                  |
| Chen et al 2012 [12]        | NA        | NA        | +                           | Anterior        | T1-T3, L4              |
| Hsu et al 2015 [13]         | Hypo      | Hypo      | +                           | Circumferential | T2-T4                  |
| Van der pal et al 2015 [14] | Hypo      | Hypo      | +                           | Circumferential | C7-T7                  |
| Park JY et al 2020 [15]     | Hypo      | Hypo      | NA                          | Posterior       | C4-T4                  |
| Qin et al 2015 [16]         | Iso       | Hypo      | +                           | Anterior        | T2-T6                  |
| Kutty RK et al 2019 [17]    | Hypo      | Hypo      | +                           | Anterior        | C7-T1                  |
| Ranasinghe et al 2011 [18]  | Hypo      | Hypo      | +                           | Circumferential | T1-T6                  |
|                             | NA        | NA        | +                           | Circumferential | C4-T11                 |
|                             | NA        | NA        | +                           | Circumferential | T4-T9                  |
| Takahashi H et al 2010 [19] | Iso       | Iso       | +                           | Anterior        | C3-C7                  |

|                              |      |      |   |                 |         |
|------------------------------|------|------|---|-----------------|---------|
| Park TJ et al 2016 [20]      | Hypo | Hypo | + | Ant and Post    | T2-T9   |
| Tosa M et al 2015 [21]       | Hypo | Hypo | + | Circumferential | T11-T12 |
| Maheshwari V et al 2016 [22] | NA   | NA   | + | Circumferential | C2-C5   |
| Present case                 | Hypo | Hypo | + | Circumferential | C2-T2   |

Abbreviations: Hypo: hypointense, Iso: isointense, Ant and Post: anterior and posterior.

| <b>Study</b>                | <b>Drugs</b>     | <b>Surgery</b> | <b>Relapse (in weeks)</b> | <b>Prognosis</b> |
|-----------------------------|------------------|----------------|---------------------------|------------------|
| Alsulaiman A 2020 [4]       | MPS**+PRED**     | NO             | 24                        | I                |
| Bang JH et al 2015 [5]      | NO               | YES            | -                         | PI               |
| Fukuda A et al 2017 [6]     | PRED             | NO             | -                         | I                |
| TK Jee et al 2014 [7]       | MPS              | YES            | -                         | PI               |
| Kim JH et al 2011 [8]       | DEXA+MPS*+PRED** | YES            | 4                         | I                |
|                             | DEXA             | YES            | -                         | NI               |
| Lowden MR et al 2009 [9]    | NA               | NA             | -                         | NA               |
| Lucas Lodomiro AM 2020 [10] | NO               | YES            | -                         | I                |
| Olubajo F et al 2017 [11]   | IVIG+ DEXA       | YES            | -                         | PI               |
| Chen et al 2012 [12]        | STEROIDS         | YES            | -                         | I                |
| Hsu et al 2015 [13]         | NA               | NA             | -                         | NA               |
| Van der pal et al 2015 [14] | PRED*+MTX*       | YES            | 12                        | I                |
| Park JY et al 2020 [15]     | DEXA             | YES            | -                         | NI               |
| Qin et al 2015 [16]         | MPS+PRED         | YES            | 1                         | NI               |
| Kutty RK et al 2019 [17]    | MPS*+PRED**      | YES*           | 6                         | I                |
| Ranasinghe et al 2011 [18]  | DEXA+PRED        | YES            | -                         | PI               |
|                             | DEXA+PRED        | YES            | -                         | PI               |
|                             | DEXA             | YES            | -                         | NI               |
| Takahashi H et al 2010 [19] | PRED             | YES            | -                         | I                |

|                              |                |     |   |    |
|------------------------------|----------------|-----|---|----|
| Park TJ et al 2016 [20]      | STEROID**+MTX* | YES | 8 | PI |
| Tosa M et al 2015 [21]       | PRED           | YES | - | I  |
| Maheshwari V et al 2016 [22] | NO             | YES | - | I  |
| Present case                 | PRED           | NO  | - | I  |

\*Indicate drug used while relapse only, \*\*Indicate drugs used while initial treatment and during relapse.

Abbreviations: MPS: methylprednisolone, PRED: prednisone, DEXA: dexamethasone, IVIG: intravenous immunoglobulin, MTX: methotrexate, I: completely improved, PI: partial improvement with some remaining neurologic disability, NI: no improvement.

## References

4. Alsulaiman A. Idiopathic Hypertrophic Spinal Pachymeningitis: A Diagnostic Challenge: A Case Report and Review of the Literature. *J Neurosci Rural Pract.* 2020 Jan;11(1):175-177.
5. Bang JH, Cho KT, Kim EJ. Idiopathic Hypertrophic Pachymeningitis in the Craniocervical Junction. *Korean J Spine.* 2015 Sep;12(3):169-72.
6. Fukuda A, Punaro E, Rogério F, de Souza Queiroz L, Reis F. Idiopathic hypertrophic pachymeningitis as a rare cause of cervical compressive myelopathy. *J Craniovertebr Junction Spine.* 2017 Oct-Dec;8(4):387-389
7. Jee TK, Lee SH, Kim ES, Eoh W. Idiopathic hypertrophic spinal pachymeningitis with an osteolytic lesion. *J Korean Neurosurg Soc.* 2014 Aug;56(2):162-5.
8. Kim JH, Park YM, Chin DK. Idiopathic hypertrophic spinal pachymeningitis : report of two cases and review of the literature. *J Korean Neurosurg Soc.* 2011 Oct;50(4):392-5.
9. Lowden MR, Gill D. Teaching NeuroImage: idiopathic hypertrophic spinal pachymeningitis. *Neurology.* 2009 Feb 3;72(5):e27
10. Araújo Melo LL, Daher MT, Gonçalves MVM, Freitas MB. Idiopathic Hypertrophic Spinal Pachymeningitis: A Case Report. *Rev Bras Ortop (Sao Paulo).* 2021 Aug 13;57(3):521-523
11. Olubajo F, Yermakova T, Highley JR, Arzoglou V. Concomitant idiopathic hypertrophic spinal pachymeningitis and Guillain-Barré syndrome in a patient: coincidence or a triggering mechanism? *J Neurosurg Spine.* 2017 Sep;27(3):335-340.
12. CHEN H, LI Y, MEHRA S et al Idiopathic Hypertrophic Pachymeningitis as a Rare Cause of Spinal cord compression *Journal of Medical Cases, North America*3, 2012 Aug 3;4 :267-269
13. Hsu HT, Hsu SS, Chien CC, Lai PH. Teaching NeuroImages: Idiopathic hypertrophic spinal pachymeningitis mimicking epidural lymphoma. *Neurology.* 2015 Mar 3;84(9):e67-8

14. van der Pol CB, Chakraborty S, Côté I, Humphrey-Murto S, Michaud J. Case 216: hypertrophic spinal pachymeningitis. *Radiology*. 2015 Apr;275(1):303-7.
15. Park JY, Choi I, Khil EK, Kim WJ, Shin IY. Idiopathic Hypertrophic Spinal Pachymeningitis with Spinal Cord Lesion: A Case Report. *Korean J Neurotrauma*. 2020 Jun 5;16(2):367-373.
16. Qin LX, Wang CY, Hu ZP, Zeng LW, Tan LM, Zhang HN. Idiopathic hypertrophic spinal pachymeningitis: a case report and review of literature. *Eur Spine J*. 2015 May;24 Suppl 4:S636-43.
17. Kutty RK, Sreemathyamma SB, Sivanandapanicker JL, Peethambaran A. Idiopathic Hypertrophic Spinal Pachymeningitis: A Rare Cause of Spinal Cord Compression. *Neurol India*. 2019 Sep-Oct;67(5):1380-1385
18. Ranasinghe MG, Zalatimo O, Rizk E, Specht CS, Reiter GT, Harbaugh RE, Sheehan J. Idiopathic hypertrophic spinal pachymeningitis. *J Neurosurg Spine*. 2011 Aug;15(2):195-201.
19. Takahashi H, Wada A, Yokoyama Y, Ishii M, Shibuya K, Suguro T. Idiopathic hypertrophic spinal pachymeningitis: a case report. *J Orthop Surg (Hong Kong)*. 2010 Apr;18(1):113-7
20. Park TJ, Seo WD, Kim SY, Cho JH, Kim DH, Kim KH. Effective Response of Methotrexate for Recurrent Idiopathic Hypertrophic Spinal Pachymeningitis. *Korean J Spine*. 2016 Dec;13(4):200-203.
21. Tosa M, Hara M, Morita A, Ninomiya S, Ebashi M, Kamei S, Maseda M, Tokuhashi Y, Hemmi A, Nemoto N. Idiopathic Hypertrophic Spinal Pachymeningitis. *Intern Med*. 2015;54(15):1923-6.
22. Maheshwari V, Gill M, Kumar M, Srivastava C. Idiopathic hypertrophic cervical pachymeningitis - A rare report. *Neurol India*. 2016 Sep-Oct;64(5):1038-40.
